# Supplementary material for: Electrophoretic-deposited MXene titanium coatings in regulating bacteria and cell response for peri-implantitis
Source: Front Chem. 2022 Sep 29;10:991481. doi: 10.3389/fchem.2022.991481 (PMC9558740; doi:10.3389/fchem.2022.991481)
Supplement: Supplementary file 3 [file DataSheet1.ZIP]

Archive with 91 entries (75 files):
- Antibacterial activity/Agar reculture observation/
- Antibacterial activity/Agar reculture observation/MRSA/
- Antibacterial activity/Agar reculture observation/MRSA/Counting/
- Antibacterial activity/Agar reculture observation/MRSA/Counting/InkedM 30-1000(SYBR Gold)_LI.jpg
- Antibacterial activity/Agar reculture observation/MRSA/Counting/InkedM 40-1000(SYBR Gold)_LI.jpg
- Antibacterial activity/Agar reculture observation/MRSA/Counting/InkedM 50-1000(SYBR Gold)_LI.jpg
- Antibacterial activity/Agar reculture observation/MRSA/Counting/InkedM Ti-1000(SYBR Gold)_LI.jpg
- Antibacterial activity/Agar reculture observation/MRSA/M 30-10_2(SYBR Gold).jpg
- Antibacterial activity/Agar reculture observation/MRSA/M 30-100_2(SYBR Gold).jpg
- Antibacterial activity/Agar reculture observation/MRSA/M 30-1000(SYBR Gold).jpg
- Antibacterial activity/Agar reculture observation/MRSA/M 40-10(SYBR Gold).jpg
- Antibacterial activity/Agar reculture observation/MRSA/M 40-100(SYBR Gold).jpg
- Antibacterial activity/Agar reculture observation/MRSA/M 40-1000(SYBR Gold).jpg
- Antibacterial activity/Agar reculture observation/MRSA/M 50-10(SYBR Gold).jpg
- Antibacterial activity/Agar reculture observation/MRSA/M 50-100(SYBR Gold).jpg
- Antibacterial activity/Agar reculture observation/MRSA/M 50-1000(SYBR Gold).jpg
- Antibacterial activity/Agar reculture observation/MRSA/M 50-10-1(SYBR Gold).jpg
- Antibacterial activity/Agar reculture observation/MRSA/M Ti -100_2(SYBR Gold).jpg
- Antibacterial activity/Agar reculture observation/MRSA/M Ti-10_2(SYBR Gold).jpg
- Antibacterial activity/Agar reculture observation/MRSA/M Ti-1000(SYBR Gold).jpg
- Antibacterial activity/Agar reculture observation/MRSA/M40-10_1(SYBR Gold).jpg
- Antibacterial activity/Agar reculture observation/reduction percentages of bacteria colonies.tif
- Antibacterial activity/Agar reculture observation/S. aureus/
- Antibacterial activity/Agar reculture observation/S. aureus/Counting/
- Antibacterial activity/Agar reculture observation/S. aureus/Counting/InkedInkedS Ti-1000(SYBR Gold)_LI.jpg
- Antibacterial activity/Agar reculture observation/S. aureus/Counting/InkedS 30-1000(SYBR Gold)_LI.jpg
- Antibacterial activity/Agar reculture observation/S. aureus/Counting/InkedS 40-1000(SYBR Gold)_LI.jpg
- Antibacterial activity/Agar reculture observation/S. aureus/Counting/InkedS 50-1000(SYBR Gold)_LI.jpg
- Antibacterial activity/Agar reculture observation/S. aureus/S 30-1000(SYBR Gold).jpg
- Antibacterial activity/Agar reculture observation/S. aureus/S 30-100-1 (SYBR Gold).jpg
- Antibacterial activity/Agar reculture observation/S. aureus/S 30-10-1 (SYBR Gold).jpg
- Antibacterial activity/Agar reculture observation/S. aureus/S 40-1000(SYBR Gold).jpg
- Antibacterial activity/Agar reculture observation/S. aureus/S 40-100-2 (SYBR Gold).jpg
- Antibacterial activity/Agar reculture observation/S. aureus/S 40-10-1 (SYBR Gold).jpg
- Antibacterial activity/Agar reculture observation/S. aureus/S 50-1000(SYBR Gold).jpg
- Antibacterial activity/Agar reculture observation/S. aureus/S 50-100-2(SYBR Gold).jpg
- Antibacterial activity/Agar reculture observation/S. aureus/S 50-10-1(SYBR Gold).jpg
- Antibacterial activity/Agar reculture observation/S. aureus/S Ti-1000(SYBR Gold).jpg
- Antibacterial activity/Agar reculture observation/S. aureus/S Ti-100-1(SYBR Gold).jpg
- Antibacterial activity/Agar reculture observation/S. aureus/S Ti-10-1(SYBR Gold).jpg
- Antibacterial activity/Agar reculture observation/statistics.xlsx
- Antibacterial activity/Evaluation of bacterial viability/
- Antibacterial activity/Evaluation of bacterial viability/Mrsa/
- Antibacterial activity/Evaluation of bacterial viability/Mrsa/~$Mrsa.xlsx
- Antibacterial activity/Evaluation of bacterial viability/Mrsa/am96┐╫║┌░σ Mrsa.jpg
- Antibacterial activity/Evaluation of bacterial viability/Mrsa/Mrsa.xlsx
- Antibacterial activity/Evaluation of bacterial viability/Mrsa/╧╕╛·╗ε┴a╩2╛▌ Mrsa.jpg
- Antibacterial activity/Evaluation of bacterial viability/S. aureus/
- Antibacterial activity/Evaluation of bacterial viability/S. aureus/~$╜≡╞╧.xlsx
- Antibacterial activity/Evaluation of bacterial viability/S. aureus/am96┐╫║┌░σ ╜≡╞╧.jpg
- Antibacterial activity/Evaluation of bacterial viability/S. aureus/╜≡╞╧.xlsx
- Antibacterial activity/Evaluation of bacterial viability/S. aureus/╧╕╛·╗ε┴a╩2╛▌ ╜≡╞╧.jpg
- Antibacterial activity/Evaluation of bacterial viability/╫ε╓╒╩2╛▌ú1⁄2═╝/
- Antibacterial activity/Evaluation of bacterial viability/╫ε╓╒╩2╛▌ú1⁄2═╝/Data 1.tif
- Antibacterial activity/Evaluation of bacterial viability/╫ε╓╒╩2╛▌ú1⁄2═╝/statistics.xlsx
- Antibacterial activity/Intracellular reactive oxide assay/
- Antibacterial activity/Intracellular reactive oxide assay/Mrsa/
- Antibacterial activity/Intracellular reactive oxide assay/Mrsa/96┐╫║┌░σ Mrsa.jpg
- Antibacterial activity/Intracellular reactive oxide assay/Mrsa/Brown-Forsythe and Welch ANOVA tests of Data 1.txt
- Antibacterial activity/Intracellular reactive oxide assay/Mrsa/Data 1.tif
- Antibacterial activity/Intracellular reactive oxide assay/Mrsa/Mrsa.xlsx
- Antibacterial activity/Intracellular reactive oxide assay/Mrsa/╗ε╨╘╤⌡╩2╛▌ Mrsa.jpg
- Antibacterial activity/Intracellular reactive oxide assay/S. aureus/
- Antibacterial activity/Intracellular reactive oxide assay/S. aureus/96┐╫║┌░σ ╜≡╞╧.jpg
- Antibacterial activity/Intracellular reactive oxide assay/S. aureus/Brown-Forsythe and Welch ANOVA tests of Data 2.txt
- Antibacterial activity/Intracellular reactive oxide assay/S. aureus/Data 2.tif
- Antibacterial activity/Intracellular reactive oxide assay/S. aureus/╗ε╨╘╤⌡╩2╛▌ ╜≡╞╧.jpg
- Antibacterial activity/Intracellular reactive oxide assay/S. aureus/╜≡╞╧.xlsx
- Antibacterial activity/Intracellular reactive oxide assay/╫ε╓╒╗¡═╝╩2╛▌ú1⁄2═╝/
- Antibacterial activity/Intracellular reactive oxide assay/╫ε╓╒╗¡═╝╩2╛▌ú1⁄2═╝/2way ANOVA of Data 3.txt
- Antibacterial activity/Intracellular reactive oxide assay/╫ε╓╒╗¡═╝╩2╛▌ú1⁄2═╝/Data 3.tif
- Antibacterial activity/Intracellular reactive oxide assay/╫ε╓╒╗¡═╝╩2╛▌ú1⁄2═╝/statistics.xlsx
- Antibacterial activity/SEM observation/
- Antibacterial activity/SEM observation/MRSA/
- Antibacterial activity/SEM observation/MRSA/2 M30 5k.jpg
- Antibacterial activity/SEM observation/MRSA/2_001 M30 4w.jpg
- Antibacterial activity/SEM observation/MRSA/5_002 Ti 5k.jpg
- Antibacterial activity/SEM observation/MRSA/5_003 Ti 4w.jpg
- Antibacterial activity/SEM observation/MRSA/6 M40 5k.jpg
- Antibacterial activity/SEM observation/MRSA/6_001 M40 4w.jpg
- Antibacterial activity/SEM observation/MRSA/6_002 M50 4w.jpg
- Antibacterial activity/SEM observation/MRSA/6-003 M50 5k.jpg
- Antibacterial activity/SEM observation/S. aureus/
- Antibacterial activity/SEM observation/S. aureus/M30 4w.jpg
- Antibacterial activity/SEM observation/S. aureus/M30 5k.jpg
- Antibacterial activity/SEM observation/S. aureus/M40 4w.jpg
- Antibacterial activity/SEM observation/S. aureus/M40 5k.jpg
- Antibacterial activity/SEM observation/S. aureus/M50 4w.jpg
- Antibacterial activity/SEM observation/S. aureus/M50 5k.jpg
- Antibacterial activity/SEM observation/S. aureus/Ti 4w.jpg
- Antibacterial activity/SEM observation/S. aureus/Ti 5k.jpg
