# Supplementary material for: Electrophoretic-deposited MXene titanium coatings in regulating bacteria and cell response for peri-implantitis
Source: Front Chem. 2022 Sep 29;10:991481. doi: 10.3389/fchem.2022.991481 (PMC9558740; doi:10.3389/fchem.2022.991481)
Supplement: Supplementary file 3 [file DataSheet1.ZIP › Antibacterial activity/Agar reculture observation/statistics.xlsx]

## Sheet: Sheet1
reduction percentages of bacteria	Ti	M30	M40	M50
colonies	0	23.01	41.72	51.23
MRSA	0	58.11	92.9	95.63
