# Supplementary material for: Electrophoretic-deposited MXene titanium coatings in regulating bacteria and cell response for peri-implantitis
Source: Front Chem. 2022 Sep 29;10:991481. doi: 10.3389/fchem.2022.991481 (PMC9558740; doi:10.3389/fchem.2022.991481)
Supplement: Supplementary file 3 [file DataSheet1.ZIP › Antibacterial activity/Evaluation of bacterial viability/Mrsa/Mrsa.xlsx]

## Sheet: Sheet1
Ti	M30	M40	M50
2.3	1.9	0.96	0.88
2.3	1.9	0.91	0.8
2.3	1.9	0.91	0.94
2.4	1.9	1.1	0.94
Cell viability(%)
98.92	82.61	41.74	38.26
98.92	82.61	39.57	34.78
103.22	82.61	39.57	40.87
