# Supplementary material for: Electrophoretic-deposited MXene titanium coatings in regulating bacteria and cell response for peri-implantitis
Source: Front Chem. 2022 Sep 29;10:991481. doi: 10.3389/fchem.2022.991481 (PMC9558740; doi:10.3389/fchem.2022.991481)
Supplement: Supplementary file 3 [file DataSheet1.ZIP › Antibacterial activity/Evaluation of bacterial viability/S. aureus/╜≡╞╧.xlsx]

## Sheet: Sheet1
Ti	M30	M40	M50
2.9	2	1.9	1.6
2.9	2	1.9	1.6
2.9	2	1.9	1.6
2.9	2	1.8	1.5
Cell viability (%)
100	68.97	65.52	55.17
100	68.97	65.52	55.17
100	68.97	62.07	51.72
