# Supplementary material for: Electrophoretic-deposited MXene titanium coatings in regulating bacteria and cell response for peri-implantitis
Source: Front Chem. 2022 Sep 29;10:991481. doi: 10.3389/fchem.2022.991481 (PMC9558740; doi:10.3389/fchem.2022.991481)
Supplement: Supplementary file 3 [file DataSheet1.ZIP › Antibacterial activity/Evaluation of bacterial viability/╫ε╓╒╩2╛▌ú1⁄2═╝/statistics.xlsx]

## Sheet: Sheet1
S. aureus	100	100	100	68.97	68.97	68.97	65.52	62.07	65.52	55.17	51.72	55.17
MRSA	98.92	98.92	103.22	82.61	82.61	82.61	41.74	39.57	39.57	38.26	40.87	34.78
