# Supplementary material for: Electrophoretic-deposited MXene titanium coatings in regulating bacteria and cell response for peri-implantitis
Source: Front Chem. 2022 Sep 29;10:991481. doi: 10.3389/fchem.2022.991481 (PMC9558740; doi:10.3389/fchem.2022.991481)
Supplement: Supplementary file 3 [file DataSheet1.ZIP › Antibacterial activity/Intracellular reactive oxide assay/Mrsa/Brown-Forsythe and Welch ANOVA tests of Data 1.txt]

Number of families	1
Number of comparisons per family	6
Alpha	0.05
Dunnett's T3 multiple comparisons test	Mean Diff.	95.00% CI of diff.	Below threshold?	Summary	Adjusted P Value
Ti vs. M30	0.5750	0.03862 to 1.111	Yes	*	0.0187	A-B
Ti vs. M40	0.6000	0.06504 to 1.135	Yes	*	0.0166	A-C
Ti vs. M50	0.7750	0.1090 to 1.441	Yes	*	0.0163	A-D
M30 vs. M40	0.02500	-0.3453 to 0.3953	No	ns	0.9987	B-C
M30 vs. M50	0.2000	-0.1622 to 0.5622	No	ns	0.1632	B-D
M40 vs. M50	0.1750	0.01108 to 0.3389	Yes	*	0.0185	C-D
Test details	Mean 1	Mean 2	Mean Diff.	SE of diff.	n1	n2	t	DF
Ti vs. M30	2.950	2.375	0.5750	0.1146	4	4	5.019	5.184
Ti vs. M40	2.950	2.350	0.6000	0.1000	4	4	6.000	3.541
Ti vs. M50	2.950	2.175	0.7750	0.09895	4	4	7.832	3.407
M30 vs. M40	2.375	2.350	0.02500	0.06922	4	4	0.3612	4.210
M30 vs. M50	2.375	2.175	0.2000	0.06770	4	4	2.954	3.924
M40 vs. M50	2.350	2.175	0.1750	0.03819	4	4	4.583	5.880
