# Supplementary material for: Electrophoretic-deposited MXene titanium coatings in regulating bacteria and cell response for peri-implantitis
Source: Front Chem. 2022 Sep 29;10:991481. doi: 10.3389/fchem.2022.991481 (PMC9558740; doi:10.3389/fchem.2022.991481)
Supplement: Supplementary file 3 [file DataSheet1.ZIP › Antibacterial activity/Intracellular reactive oxide assay/Mrsa/Mrsa.xlsx]

## Sheet: Sheet1
Ti	M30	M40	M50	B
2.8	2.4	2.4	2.2	2.8
3	2.4	2.4	2.2	2.9
2.8	2.5	2.3	2.2	2.9
3.2	2.2	2.3	2.1	3
