# Supplementary material for: Electrophoretic-deposited MXene titanium coatings in regulating bacteria and cell response for peri-implantitis
Source: Front Chem. 2022 Sep 29;10:991481. doi: 10.3389/fchem.2022.991481 (PMC9558740; doi:10.3389/fchem.2022.991481)
Supplement: Supplementary file 3 [file DataSheet1.ZIP › Antibacterial activity/Intracellular reactive oxide assay/S. aureus/Brown-Forsythe and Welch ANOVA tests of Data 2.txt]

Number of families	1
Number of comparisons per family	6
Alpha	0.05
Dunnett's T3 multiple comparisons test	Mean Diff.	95.00% CI of diff.	Below threshold?	Summary	Adjusted P Value
Ti vs. M30	0.8500	0.2304 to 1.470	Yes	**	0.0053	A-B
Ti vs. M40	1.250	0.7265 to 1.773	Yes	***	0.0005	A-C
Ti vs. M50	1.700	1.194 to 2.206	Yes	****	<0.0001	A-D
M30 vs. M40	0.4000	-0.1734 to 0.9734	No	ns	0.0972	B-C
M30 vs. M50	0.8500	0.2133 to 1.487	Yes	**	0.0088	B-D
M40 vs. M50	0.4500	0.1222 to 0.7778	Yes	**	0.0053	C-D
Test details	Mean 1	Mean 2	Mean Diff.	SE of diff.	n1	n2	t	DF
Ti vs. M30	3.750	2.900	0.8500	0.1443	4	4	5.889	5.915
Ti vs. M40	3.750	2.500	1.250	0.1118	4	4	11.18	4.927
Ti vs. M50	3.750	2.050	1.700	0.1080	4	4	15.74	4.523
M30 vs. M40	2.900	2.500	0.4000	0.1225	4	4	3.266	4.585
M30 vs. M50	2.900	2.050	0.8500	0.1190	4	4	7.141	4.229
M40 vs. M50	2.500	2.050	0.4500	0.07638	4	4	5.892	5.880
