# Supplementary material for: Electrophoretic-deposited MXene titanium coatings in regulating bacteria and cell response for peri-implantitis
Source: Front Chem. 2022 Sep 29;10:991481. doi: 10.3389/fchem.2022.991481 (PMC9558740; doi:10.3389/fchem.2022.991481)
Supplement: Supplementary file 3 [file DataSheet1.ZIP › Antibacterial activity/Intracellular reactive oxide assay/S. aureus/╜≡╞╧.xlsx]

## Sheet: Sheet1
Ti	M30	M40	M50	B
3.6	12	3.9	2.3	2.7
3.6	12	3.8	2.3	2.7
3.8	13	4.1	2.3	2.7
4	12	3.9	2.3	2.8
	2.6	2.4	2
	2.9	2.4	2
	3.1	2.6	2
	3	2.6	2.2
