# Supplementary material for: Electrophoretic-deposited MXene titanium coatings in regulating bacteria and cell response for peri-implantitis
Source: Front Chem. 2022 Sep 29;10:991481. doi: 10.3389/fchem.2022.991481 (PMC9558740; doi:10.3389/fchem.2022.991481)
Supplement: Supplementary file 3 [file DataSheet1.ZIP › Antibacterial activity/Intracellular reactive oxide assay/╫ε╓╒╗¡═╝╩2╛▌ú1⁄2═╝/statistics.xlsx]

## Sheet: Sheet1
	Ti				M30				M40				M50
S. aureus	3.6	3.6	3.8	4	2.6	3	2.9	3.1	2.4	2.4	2.6	2.6	2	2	2	2.2
MRSA	2.8	2.8	3	3.2	2.4	2.4	2.5	2.2	2.4	2.4	2.3	2.3	2.2	2.2	2.2	2.1
S. aureus	0.96	0.96	1.013	1.067	0.693	0.8	0.773	0.827	0.64	0.64	0.693	0.693	0.533	0.533	0.533	0.587
MRSA	0.95	0.95	1.017	1.085	0.814	0.814	0.847	0.746	0.814	0.814	0.78	0.78	0.746	0.746	0.746	0.712
